# Supplementary material for: Long-Term Culture of Distal Airway Epithelial Cells Allows Differentiation Towards Alveolar Epithelial Cells Suited for Influenza Virus Studies
Source: PubMed Central journal article supplement — eBioMedicine. 2018 Jun 22;33:230–41. doi: 10.1016/j.ebiom.2018.05.032 (PMC6085545; doi:10.1016/j.ebiom.2018.05.032), 2018-06-22

## **Supplementary Materials and Methods**

### **Preparation of feeder fibroblasts**

The NIH/3T3 mouse embryonic fibroblast cell line was purchased from the American Type Culture Collection (ATCC CRL-1658). NIH/3T3-GFP was obtained by transducing NIH3T3 with pLenti PGK GFP Puro (Addgene). Both were maintained in Dulbecco's Modified Eagle Medium (DMEM, Life Technologies, Darmstadt, Germany) supplemented with 10% fetal calf serum (Biochrom), 2 mM L-glutamine (Life Technologies) and 10 mM sodium pyruvate (Sigma-Aldrich, Taufkirchen, Germany). NIH/3T3 and NIH/3T3-GFP were gamma-irradiated with 30 Gy by Gammacell Exactor (Best Theratronics, Hertfordshire, UK) before seeding at a density of  $1 \times 10^5/\text{cm}^2$  in tissue culture vessels, and kept in culture medium as above until use.

### **Additional cells and viruses**

A549 (ATCC CCL-185), MDCK (ATCC CCL-34) and HEK293T cells were cultured in DMEM supplemented with 10% FCS and 100 U/ml penicillin-streptomycin, 2 mM L-glutamine (Life Technologies) and 10 mM sodium pyruvate (Sigma-Aldrich, Taufkirchen, Germany). Cells were maintained at 37°C in 5% CO<sub>2</sub>.

A/England/195/2009 (H1N1pdm), A/WSN/1933 (H1N1), A/Mallard/Germany/439/2004 (H3N2), A/Panama/2007/1999 (H3N2), and A/Vietnam/1203/2004 (H5N1) were generated by reverse genetics and propagated in the allantoic cavity of embryonated eggs. Titer was determined by plaque assay on MDCK cells using agar overlay medium.

### **Passaging of primary DAECs**

Cells were passaged when they reached 70-80% confluence. For human DAECs, the feeder fibroblasts were first detached with phosphate buffered saline (PBS) containing 2 mM ethylenediaminetetraacetic acid (EDTA, Carl Roth GmbH & Co. KG, Karlsruhe, Germany) before epithelial cells were harvested by trypsinization. Collected cells were passaged to new culture vessels at a ratio of 1:5, unless otherwise

specified, or frozen stocked in liquid nitrogen until needed. Differential detachment of feeders with EDTA was skipped for chicken DAECs, as they attach to the culture surface very weakly.

### **Population doubling (PD) calculation**

The NIH3T3-GFP feeder cell line was used to calculate population doublings. Cells were suspended in culture medium after harvesting, and the number of GFP-negative cells was counted under a fluorescent microscope.  $2 \times 10^5$  cells were passaged onto a new 6-well tissue culture plate previously seeded with irradiated NIH3T3-GFP. Population doubling level at each passage was calculated as follows:

$PDn = \log_2 Y - \log_2 (2 \times 10^5)$ , where Y indicates the number of GFP-negative cells harvested (Hayflick, 1973).

The culture was terminated when DAECs did not reach 80% confluence within two weeks after splitting. The step of differential detachment with EDTA was skipped for chicken DAECs, and they were harvested only with trypsin as described above. The other procedures were the same as that for human cells.

### **Flow cytometry**

Human DAECs grown with NIH/3T3 feeders were harvested by differential trypsinization and labeled with the following antibodies: fluorescein isothiocyanate (FITC)-conjugated mouse anti-human integrin  $\alpha 6$ , phycoerythrin (PE)-conjugated mouse anti-human integrin  $\beta 4$ , allophycocyanin (APC)-conjugated CD324 (CDH-1). All antibodies for flow cytometry were purchased from Milteny Biotec (Bergisch Gladbach, Germany) and used according to the manufacturer's instructions. Propidium iodide (Life Technologies) was used to exclude dead cells from analysis.

Flow cytometry was also used to purify the epithelial cells from NIH/3T3-GFP cells. Briefly, cells were harvested by sequential treatment with 2 mM EDTA and trypsin when applicable to enrich for epithelial cells. The cells negative for both GFP and PI were collected. All analyses and sorting were performed on BD FACS Aria™ flow cytometers (Beckton Dickinson, Heidelberg, Germany). Both human and chicken DAECs were seeded in DMEM supplemented with 10% FCS, 2 mM L-glutamine and 10 mM sodium pyruvate after sorting. Purity of 99.98% GFP-negative cells was achieved using this approach.

### **Fluorescent Immunocytochemistry**

Cells cultured on coverslips were fixed with 3.7% paraformaldehyde at room temperature for 20 minutes. The cells were incubated in blocking/permeabilization solution containing 10% FCS and 0.3% TritonX-100 (Carl Roth) followed by primary antibody solution at 4°C overnight. The primary antibodies used was as follows: anti-CDH-1 (BD Biosciences, Heidelberg, Germany), anti-ΔN-p63 (), anti-cytokeratin 5 (Abcam, Cambridge, United Kingdom), anti-prosurfactant protein C (EMD-Millipore, Darmstadt, Germany), anti-aquaporin 5 (Santa Cruz, Heidelberg, Germany) and anti-SCGB1A1 (Abcam). After washing with PBS/0.1% Tween-20 (Carl Roth), the coverslips were incubated with secondary antibodies conjugated with fluorochromes (Dianova, Hamburg, Germany). Hoechst 33258 (Life Technologies) was used for nuclear staining. Images were obtained with a Leica SP-8 confocal microscope (Leica Microsystems, Wetzlar, Germany) and processed with FIJI (Schindelin et al., 2012).

### **Quantitative RT-PCR**

Total RNA was extracted with the Gene Jet RNA Purification Kit (Thermo Scientific) according to the manufacturer's instructions. One-step qRT-PCR was performed using Power SYBR® Green RNA-to-CT™ (Life Technologies). Values were normalized against glyceraldehyde-3-phosphate dehydrogenase (GAPDH) gene using the  $2^{-\Delta\Delta C_T}$  method (Livak and Schmittgen, 2001). The following primer sequences were used: human scgb1a1: 5'-CAGAGGGGAAACGAGTGAAG-3' (forward) and 5'-GCTGTGTGGCTGAAAACAGA-3' (reverse), human aqp5 5'-CGTCAACGCGCTCAACAAC-3' (forward) and 5'-GTGACAGACAGGCCAATGGAC-3' (reverse), chicken sftpa 5'-ACTCGGCAATGTTTTACTGAATC-3' (forward) and 5'-TCCTCCAGTCTCTTCACAGG-3' (reverse), chicken aqp5 5'-CTCCGGACGCTCTTCTATGT-3' (forward) and 5'-GTTGTTGAGCGAATTGATGGC-3' (reverse).

### **Replication assay**

Forty-eight hours after siRNA transfection, cells were washed twice with PBS and challenged with A/33/WSN H1N1 influenza A virus for 1 h at room temperature. Cells were then washed with DMEM

containing 0.7% BSA and 1µg/ml L-1-tosylamido-2-phenylethyl chloromethyl ketone (TPCK)-treated trypsin (Sigma) and incubated at 37°C. At 72 h post-infection supernatants containing newly produced viral particles were transferred onto freshly seeded MDCK cells. MDCK cells were then incubated for 6 h and fixed with 3.7% formaldehyde for 30 minutes. Cells were stained with Hoechst and immunolabelled with anti-NP (BIO-RAD, Puchheim, Germany) followed by anti-mouse IgG secondary antibody (Dianova). Images were obtained by using automated microscopy and analyzed by ScanR Analysis Software (Olympus, Hamburg, Germany).

### **Microarray**

Microarray experiments were performed as single-color hybridization. Quality control and quantification of total RNA was assessed using an Agilent 2100 Bioanalyzer (Agilent Technologies) and a NanoDrop 1000 UV-Vis spectrophotometer (Kisker). Total RNA was isolated with TRIzol (Life Technologies) according to the supplier's protocol using Glycogen as co-precipitant. RNA labeling was performed with the one-color Low Input Quick Amp Labeling Kit (Agilent Technologies). In brief, mRNA was reverse transcribed and amplified using an oligo-dT-T7 promoter primer and resulting cRNA was labeled with Cyanine 3-CTP. After precipitation, purification, and quantification, 0.75 µg labeled cRNA was fragmented and hybridized to custom whole genome human 8 × 60k multipack microarrays (Agilent-048908) according to the supplier's protocol (Agilent Technologies). Scanning of microarrays was performed with 3 µm resolution using a G2565CA high-resolution laser microarray scanner (Agilent Technologies). Microarray image data were analyzed with the Image Analysis/Feature Extraction software G2567AA v. A.11.5.1.1 (Agilent Technologies) using default settings and the GE1\_1105\_Oct12 extraction protocol. The extracted single-color raw data txt files were further analyzed using R and the associated BioConductor package limma (Ritchie et al., 2015). Microarray data have been deposited in the Gene Expression Omnibus (GEO; [www.ncbi.nlm.nih.gov/geo/](http://www.ncbi.nlm.nih.gov/geo/)) of the National Center for Biotechnology Information and can be accessed with the GEO accession number GSE86449. Gene ontology analyses were performed with Genecodis online analysis tool (Carmona-Saez et al., 2007; Nogales-Cadenas et al., 2009; Tabas-Madrid et al., 2012).

## Supplementary Figure Legends

### Figure S1 Expression of mature alveolar epithelial cell markers in human DAECs at early passage

(A) Immunofluorescent micrograph of human DAECs in co-culture after the first passage. Intensity of proSP-C (green) and the shape of the cells revealed heterogeneity among CDH-1 (red)-positive human DAECs. These cells show a compact round shape and express proSP-C (green) with its distribution suggesting localization in vesicles. Images are representative of three independent experiments using DAECs from one donor.

### Figure S2 Higher concentration of DBZ increases *aqp5* expression and suppress *scgb1a1*, *muc5b* and *foxj1* after separation from feeders

(A) Agarose gel electrophoresis of RT-PCR products. The white arrowhead shows the expected size of the product (122bp). Lanes: 1 and 6, 50 bp DNA ladder; 2 induced human DAECs with 20  $\mu$ M DBZ and CHIR99021, FGF7, IBMX, 8-Br-cAMP, dexamethasone and FGF10 (CKIADF), 72 h after passage; 3, induced with 100 nM DBZ and CKIADF; RNA extract from tissue, 5 No template control. 5  $\mu$ L of each crude mix after reaction was loaded on the gel, except for lane 4 where the solution was diluted to 1:10 to avoid saturation.

(B) Expression of the goblet cell marker *muc5b* and the ciliated cell marker *foxj1* in fresh tissue, DAECs in culture with feeder cells, and DAECs upon removal from feeders cells with and without induction treatment. Results are expressed as mean  $\pm$  SD from two different donor samples.

(C) qRT-PCR shows more prominent up-regulation of *aqp5* when the concentration of DBZ was increased to 20  $\mu$ M; Results are expressed as mean  $\pm$  SD from three independent experiments. \*  $p < 0.001$

(D) Expression of the epithelial cell marker *cdh-1*, the mesenchymal marker  $\alpha$ -SMA and the EMT regulatory factor *Slug*, in fresh tissue, DAECs in culture with feeder cells and DAECs upon removal from feeders cells with and without induction treatment. Results are expressed as mean  $\pm$  SD from two different donor samples.

**Figure S3 Morphological change and expression of alveolar epithelial cells markers in human DAECs after feeder removal**

(A) and (B) Immunofluorescent micrograph of human DAECs after feeder removal. The cells are compact with strong staining of proSP-C (red) at 48 h (A), while widely spread cytoplasm with staining of AQP5 (green, arrowhead) is observed at 144 h (B). Images are representative of three independent experiments using cells from one donor.

**Supplementary Tables**

**Table S1. List of small molecules used in the study**

**Suppl. Table 1**

| <b>Name</b>   | <b>Action</b>                     | <b>Tested conc.</b> | <b>Effect</b>                                |
|---------------|-----------------------------------|---------------------|----------------------------------------------|
| RepSo         | Inhibit ALK4, 5, 7                | 0.001-25 $\mu$ M    | ++                                           |
| SB202190      | Inhibit p38                       | 0.05 – 5 $\mu$ M    | -                                            |
| CHIR99021     | Inhibit GSK3b                     | 0.1 – 10 $\mu$ M    | --                                           |
| Nicotinamide  | Activate P38 pathway              | 5 – 50 mM           | -                                            |
| Dibenzazepine | Inhibit g-secretase               | 0.001 – 10 $\mu$ M  | ++ $\rightarrow$ -*<br>(“-” at higher conc.) |
| FGF7          | (Promote alveologenesis in mouse) | 10, 20 ng/ml        | -                                            |

Suppl. Fig. 1

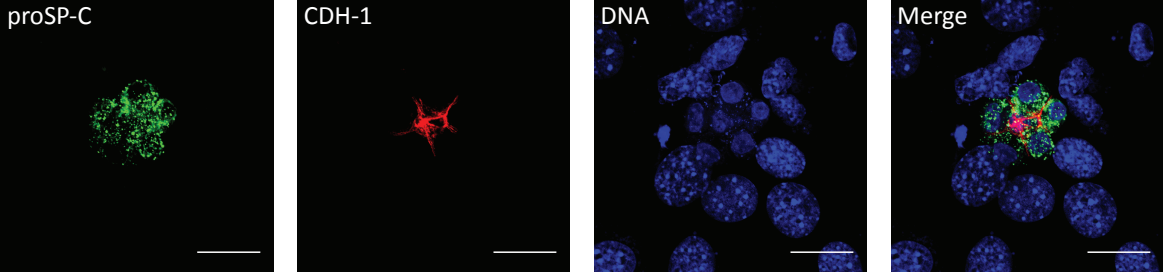



Suppl. Fig. 2

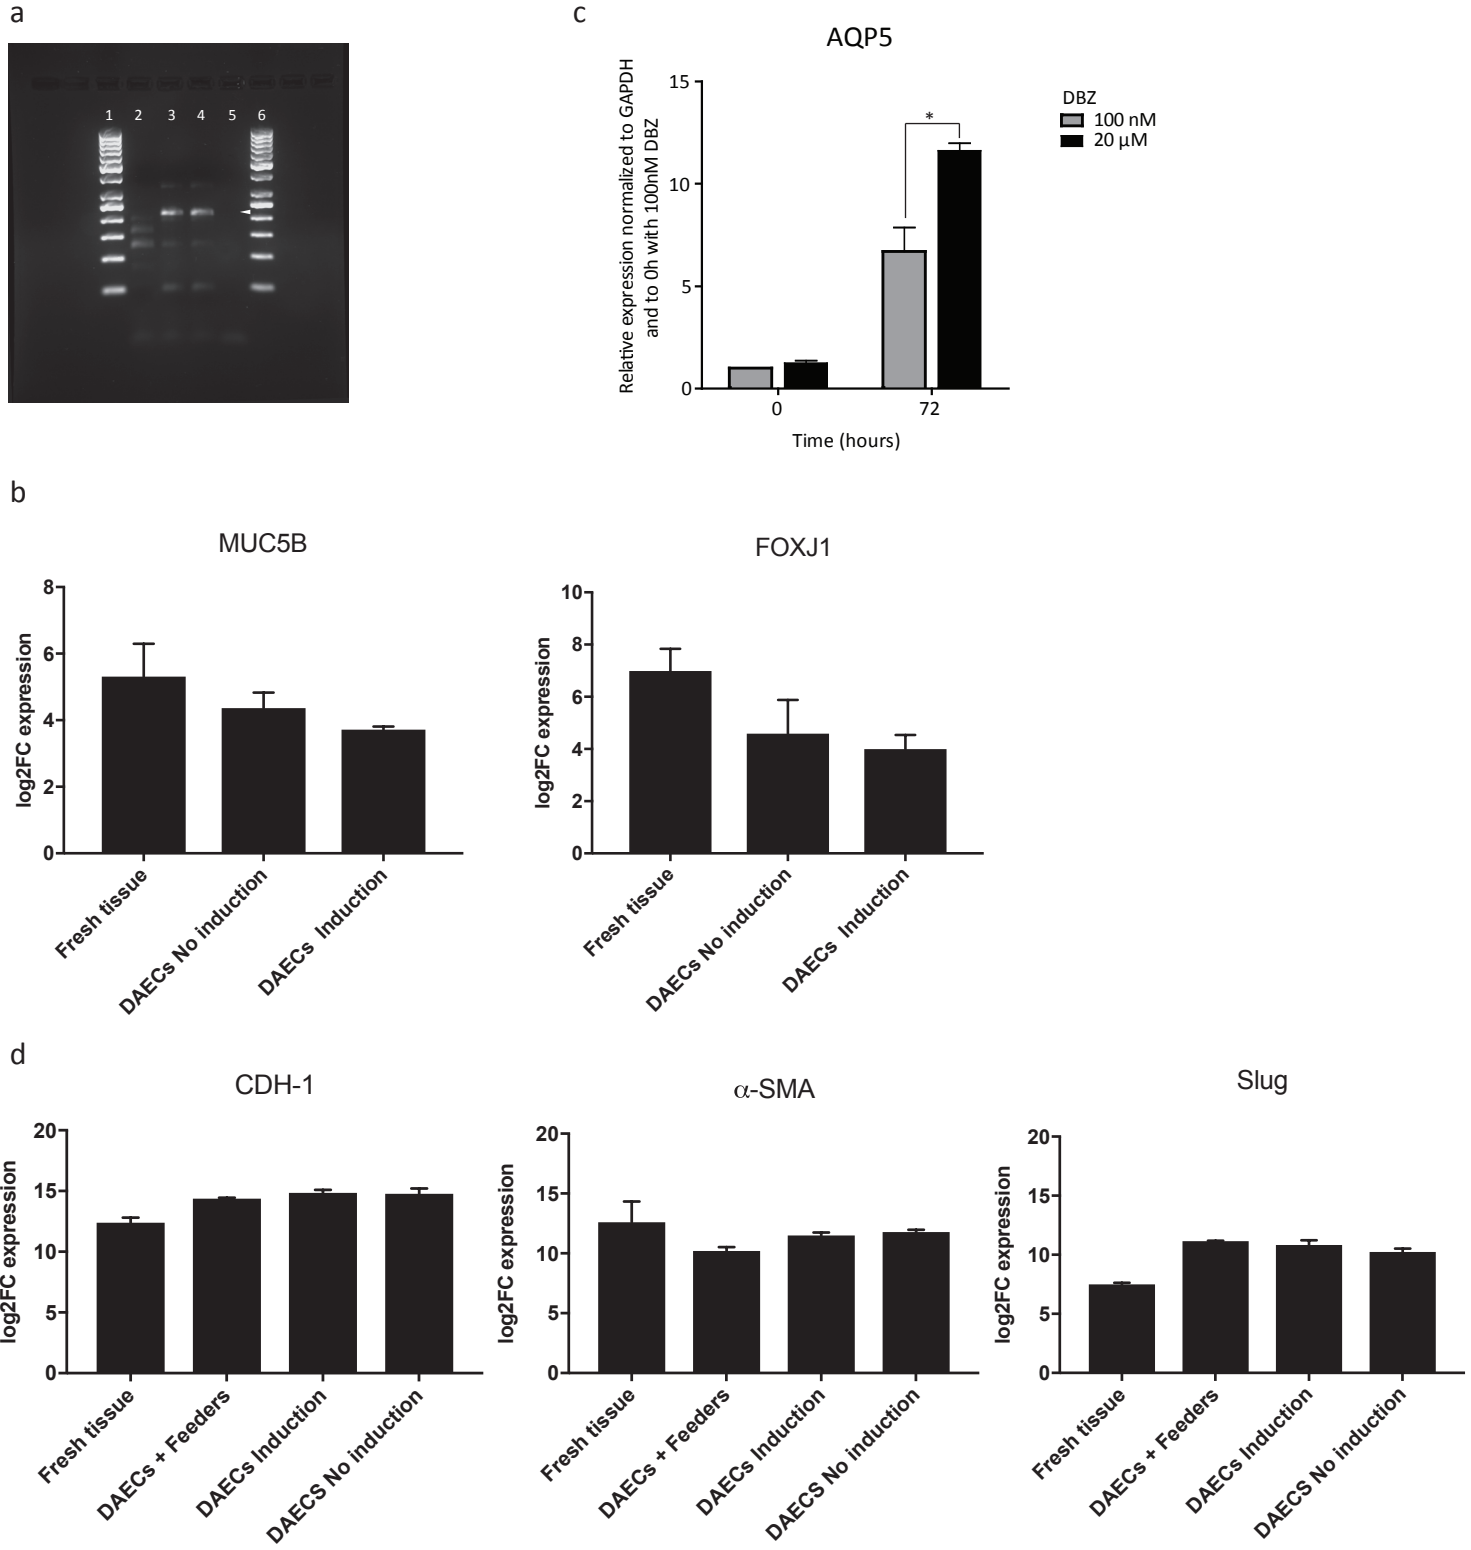

Suppl. Fig. 3

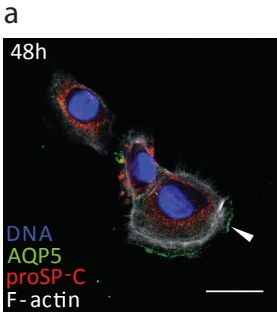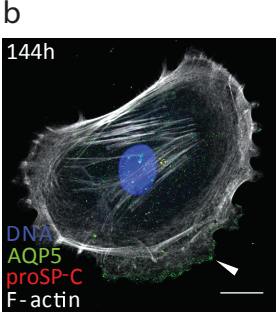

Supplement: mmc1.pdf [file mmc1.pdf]
